# Supplementary material for: Characterization of the interactions of chemically-modified therapeutic nucleic acids with plasma proteins using a fluorescence polarization assay
Source: PubMed Central journal article supplement (PMC6379706; doi:10.1093/nar/gky1260), 2018-12-19
Supplement: gky1260_supplemental_files.pdf [file gky1260_supplemental_files.pdf]

Supplementary Data

Figure S1: Binding of the 5-10-5 MOE PS PTEN ASO to the 25 most abundant human plasma proteins. Binding of serum albumin was included in each panel as a reference.

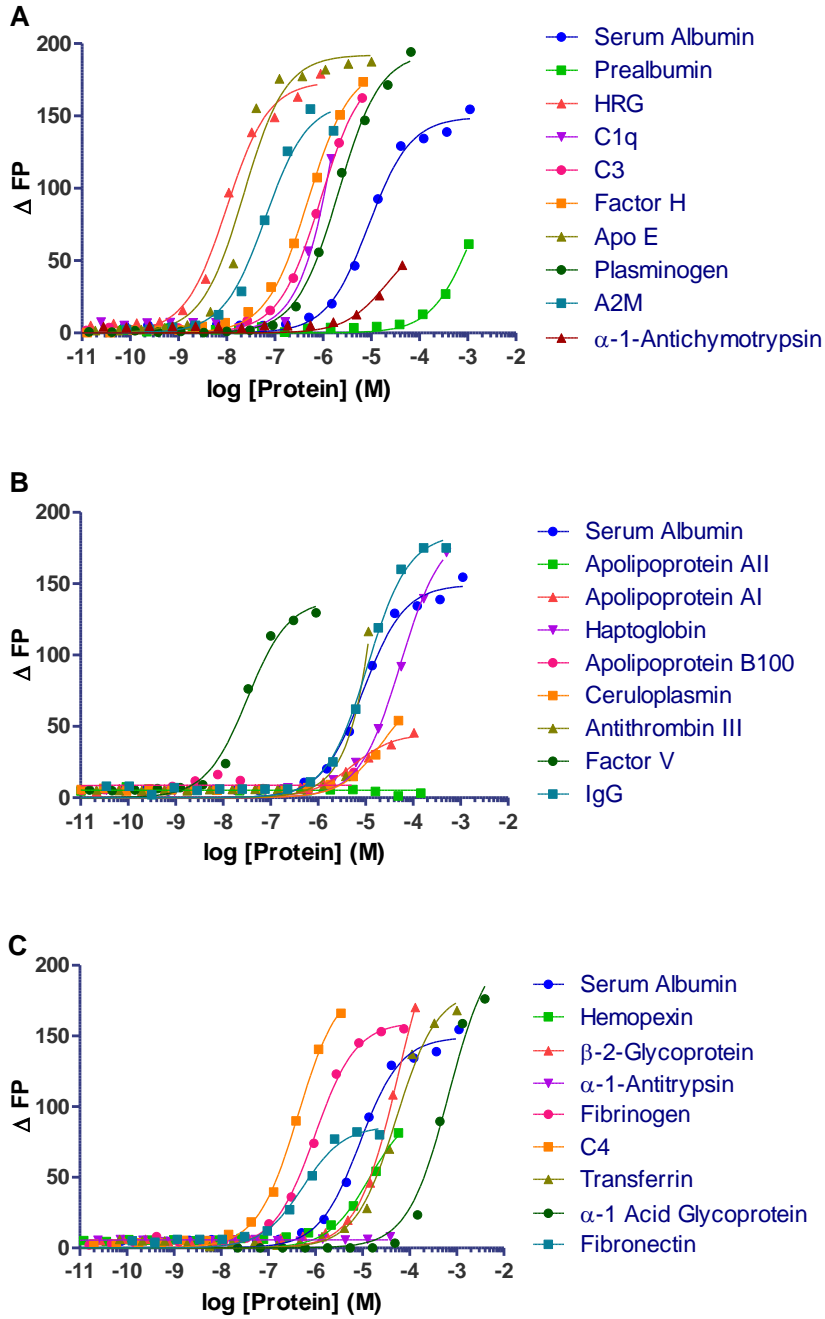

Figure S2: SEC binding profile of SRB MOE gapmer ASO to plasma from HRG  $-/-$  mice and wild type controls.

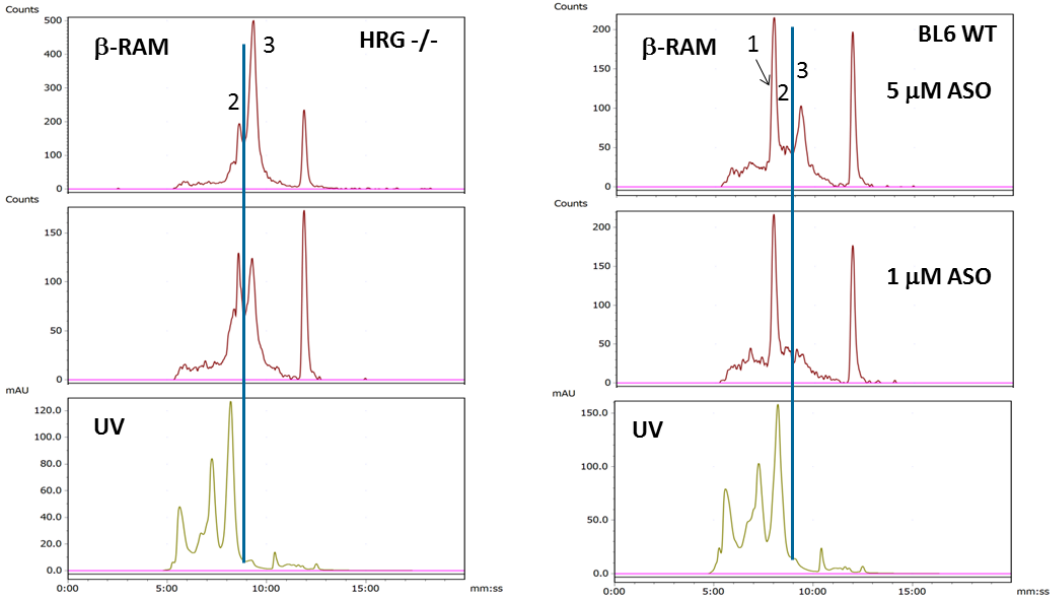

Table S1: Full list of identified plasma proteins binding to different ASO designs. Number of identified peptides listed for each protein and tested ASO design.

| Identified Proteins (243)                                              | Accession Number      | MW<br>kDa | MOE<br>PS | MOE<br>MBB | DNA<br>PS | cEt<br>PS |
|------------------------------------------------------------------------|-----------------------|-----------|-----------|------------|-----------|-----------|
| Serum albumin OS=Homo sapiens GN=ALB PE=1 SV=2                         | sp P02768 ALBU_HUMAN  | 69        | 1691      | 900        | 2472      | 1811      |
| Complement C3 OS=Homo sapiens GN=C3 PE=1 SV=2                          | sp P01024 CO3_HUMAN   | 187       | 1470      | 951        | 1731      | 950       |
| Fibronectin OS=Homo sapiens GN=FN1 PE=1 SV=4                           | sp P02751 FINC_HUMAN  | 263       | 513       | 395        | 791       | 527       |
| Complement C4-B OS=Homo sapiens GN=C4B PE=1 SV=2                       | sp P0C0L5 CO4B_HUMAN  | 193       | 439       | 420        | 771       | 450       |
| Complement C5 OS=Homo sapiens GN=C5 PE=1 SV=4                          | sp P01031 CO5_HUMAN   | 188       | 403       | 289        | 741       | 299       |
| Complement factor B OS=Homo sapiens GN=CFB PE=1 SV=2                   | sp P00751 CFAB_HUMAN  | 86        | 401       | 410        | 545       | 337       |
| Apolipoprotein B-100 OS=Homo sapiens GN=APOB PE=1 SV=2                 | sp P04114 APOB_HUMAN  | 516       | 391       | 252        | 1433      | 68        |
| Alpha-1-antichymotrypsin OS=Homo sapiens GN=SERPINA3 PE=1 SV=2         | sp P01011 AACT_HUMAN  | 48        | 356       | 457        | 362       | 322       |
| Complement factor H OS=Homo sapiens GN=CFH PE=1 SV=4                   | sp P08603 CFAH_HUMAN  | 139       | 289       | 234        | 529       | 211       |
| Plasminogen OS=Homo sapiens GN=PLG PE=1 SV=2                           | sp P00747 PLMN_HUMAN  | 91        | 261       | 245        | 389       | 195       |
| Keratin, type I cytoskeletal 9 OS=Homo sapiens GN=KRT9 PE=1 SV=3       | sp P35527 K1C9_HUMAN  | 62        | 255       | 302        | 196       | 331       |
| Alpha-2-macroglobulin OS=Homo sapiens GN=A2M PE=1 SV=3                 | sp P01023 A2MG_HUMAN  | 163       | 252       | 151        | 208       | 181       |
| Complement C4-A OS=Homo sapiens GN=C4A PE=1 SV=2                       | sp P0C0L4 CO4A_HUMAN  | 193       | 213       | 56         | 593       | 255       |
| Plasma kallikrein OS=Homo sapiens GN=KLKB1 PE=1 SV=1                   | sp P03952 KLKB1_HUMAN | 71        | 168       | 212        | 242       | 156       |
| von Willebrand factor OS=Homo sapiens GN=VWF PE=1 SV=4                 | sp P04275 VWF_HUMAN   | 309       | 120       | 42         | 61        | 12        |
| Desmoplakin OS=Homo sapiens GN=DSP PE=1 SV=3                           | sp P15924 DESP_HUMAN  | 332       | 113       | 114        | 38        | 143       |
| Ig mu chain C region OS=Homo sapiens GN=IGHM PE=1 SV=3                 | sp P01871 IGHM_HUMAN  | 49        | 113       | 96         | 207       | 81        |
| Ig gamma-1 chain C region OS=Homo sapiens GN=IGHG1 PE=1 SV=1           | sp P01857 IGHG1_HUMAN | 36        | 112       | 84         | 232       | 127       |
| Ig gamma-3 chain C region OS=Homo sapiens GN=IGHG3 PE=1 SV=2           | sp P01860 IGHG3_HUMAN | 41        | 110       | 89         | 241       | 91        |
| Ig gamma-2 chain C region OS=Homo sapiens GN=IGHG2 PE=1 SV=2           | sp P01859 IGHG2_HUMAN | 36        | 109       | 81         | 222       | 115       |
| Alpha-1-antitrypsin OS=Homo sapiens GN=SERPINA1 PE=1 SV=3              | sp P01009 A1AT_HUMAN  | 47        | 100       | 54         | 175       | 146       |
| Complement C2 OS=Homo sapiens GN=C2 PE=1 SV=2                          | sp P06681 CO2_HUMAN   | 83        | 96        | 134        | 139       | 133       |
| Kininogen-1 OS=Homo sapiens GN=KNG1 PE=1 SV=2                          | sp P01042 KNG1_HUMAN  | 72        | 93        | 118        | 92        | 174       |
| Kallistatin OS=Homo sapiens GN=SERPINA4 PE=1 SV=3                      | sp P29622 KAIN_HUMAN  | 49        | 86        | 61         | 79        | 51        |
| Histidine-rich glycoprotein OS=Homo sapiens GN=HRG PE=1 SV=1           | sp P04196 HRG_HUMAN   | 60        | 79        | 19         | 36        | 22        |
| Apolipoprotein A-I OS=Homo sapiens GN=APOA1 PE=1 SV=1                  | sp P02647 APOA1_HUMAN | 31        | 76        | 34         | 199       | 63        |
| Keratinocyte proline-rich protein OS=Homo sapiens GN=KPRP PE=1 SV=1    | sp Q5T749 KPRP_HUMAN  | 64        | 73        | 45         | 28        | 71        |
| Junction plakoglobin OS=Homo sapiens GN=JUP PE=1 SV=3                  | sp P14923 PLAK_HUMAN  | 82        | 73        | 56         | 21        | 59        |
| Prothrombin OS=Homo sapiens GN=F2 PE=1 SV=2                            | sp P00734 THRB_HUMAN  | 70        | 64        | 64         | 105       | 94        |
| Complement component C8 beta chain OS=Homo sapiens GN=C8B PE=1 SV=3    | sp P07358 CO8B_HUMAN  | 67        | 61        | 19         | 68        | 5         |
| Pregnancy zone protein OS=Homo sapiens GN=PZP PE=1 SV=4                | sp P20742 PZP_HUMAN   | 164       | 58        | 47         | 11        | 42        |
| Extracellular matrix protein 1 OS=Homo sapiens GN=ECM1 PE=1 SV=2       | sp Q16610 ECM1_HUMAN  | 61        | 56        | 55         | 41        | 32        |
| Plasma serine protease inhibitor OS=Homo sapiens GN=SERPINA5 PE=1 SV=3 | sp P05154 IPSP_HUMAN  | 46        | 55        | 116        | 64        | 72        |

|                                                                                                               |                        |     |    |     |     |     |
|---------------------------------------------------------------------------------------------------------------|------------------------|-----|----|-----|-----|-----|
| Pigment epithelium-derived factor OS=Homo sapiens<br>GN=SERPINF1 PE=1 SV=4                                    | sp P36955 PEDF_HUMAN   | 46  | 53 | 75  | 114 | 64  |
| Ig alpha-1 chain C region OS=Homo sapiens GN=IGHA1 PE=1<br>SV=2                                               | sp P01876 IGHA1_HUMAN  | 38  | 53 | 50  | 102 | 71  |
| Complement component C8 alpha chain OS=Homo sapiens<br>GN=C8A PE=1 SV=2                                       | sp P07357 CO8A_HUMAN   | 65  | 53 | 46  | 96  | 47  |
| Coagulation factor XII OS=Homo sapiens GN=F12 PE=1 SV=3                                                       | sp P00748 FA12_HUMAN   | 68  | 50 | 92  | 89  | 70  |
| Insulin-like growth factor-binding protein complex acid labile<br>subunit OS=Homo sapiens GN=IGFALS PE=1 SV=1 | sp P35858 ALS_HUMAN    | 66  | 49 | 36  | 79  | 44  |
| Ig kappa chain C region OS=Homo sapiens GN=IGKC PE=1 SV=1                                                     | sp P01834 IGKC_HUMAN   | 12  | 48 | 37  | 109 | 40  |
| Inter-alpha-trypsin inhibitor heavy chain H4 OS=Homo sapiens<br>GN=ITIH4 PE=1 SV=4                            | sp Q14624 ITIH4_HUMAN  | 103 | 44 | 160 | 213 | 189 |
| Plasma protease C1 inhibitor OS=Homo sapiens GN=SERPING1<br>PE=1 SV=2                                         | sp P05155 IC1_HUMAN    | 55  | 44 | 141 | 110 | 166 |
| Complement C1q subcomponent subunit B OS=Homo sapiens<br>GN=C1QB PE=1 SV=3                                    | sp P02746 C1QB_HUMAN   | 27  | 43 | 19  | 44  | 13  |
| Complement C1q subcomponent subunit C OS=Homo sapiens<br>GN=C1QC PE=1 SV=3                                    | sp P02747 C1QC_HUMAN   | 26  | 42 | 23  | 36  | 13  |
| Carboxypeptidase B2 OS=Homo sapiens GN=CPB2 PE=1 SV=2                                                         | sp Q961Y4 CPB2_HUMAN   | 48  | 40 | 45  | 58  | 16  |
| Inter-alpha-trypsin inhibitor heavy chain H2 OS=Homo sapiens<br>GN=ITIH2 PE=1 SV=2                            | sp P19823 ITIH2_HUMAN  | 106 | 39 | 144 | 224 | 290 |
| Fibrinogen alpha chain OS=Homo sapiens GN=FGA PE=1 SV=2                                                       | sp P02671 FIBA_HUMAN   | 95  | 38 | 170 | 449 | 620 |
| C4b-binding protein alpha chain OS=Homo sapiens GN=C4BPA<br>PE=1 SV=2                                         | sp P04003 C4BPA_HUMAN  | 67  | 36 | 92  | 191 | 89  |
| Hornerin OS=Homo sapiens GN=HRNR PE=1 SV=2                                                                    | sp Q86Y23 HORN_HUMAN   | 282 | 35 | 69  | 19  | 69  |
| Filaggrin-2 OS=Homo sapiens GN=FLG2 PE=1 SV=1                                                                 | sp Q5D862 FILA2_HUMAN  | 248 | 34 | 28  | 13  | 26  |
| Serotransferrin OS=Homo sapiens GN=TF PE=1 SV=3                                                               | sp P02787 TRFE_HUMAN   | 77  | 32 | 22  | 61  | 94  |
| Immunoglobulin lambda-like polypeptide 5 OS=Homo sapiens<br>GN=IGLL5 PE=2 SV=2                                | sp B9A064 IGLL5_HUMAN  | 23  | 32 | 31  | 57  | 37  |
| Inter-alpha-trypsin inhibitor heavy chain H1 OS=Homo sapiens<br>GN=ITIH1 PE=1 SV=3                            | sp P19827 ITIH1_HUMAN  | 101 | 29 | 51  | 111 | 184 |
| Coagulation factor XI OS=Homo sapiens GN=F11 PE=1 SV=1                                                        | sp P03951 FA11_HUMAN   | 70  | 29 | 8   | 29  | 13  |
| Haptoglobin OS=Homo sapiens GN=HP PE=1 SV=1                                                                   | sp P00738 HPT_HUMAN    | 45  | 28 | 32  | 48  | 39  |
| Beta-2-glycoprotein 1 OS=Homo sapiens GN=APOH PE=1 SV=3                                                       | sp P02749 APOH_HUMAN   | 38  | 27 | 89  | 210 | 165 |
| Protein S100-A8 OS=Homo sapiens GN=S100A8 PE=1 SV=1                                                           | sp P05109 S100A8_HUMAN | 11  | 26 | 40  | 11  | 22  |
| Complement component C8 gamma chain OS=Homo sapiens<br>GN=C8G PE=1 SV=3                                       | sp P07360 CO8G_HUMAN   | 22  | 26 | 15  | 39  | 19  |
| Skin-specific protein 32 OS=Homo sapiens GN=XP32 PE=1<br>SV=1                                                 | sp Q5T750 XP32_HUMAN   | 26  | 26 | 16  | 9   | 25  |
| Sulfhydryl oxidase 1 OS=Homo sapiens GN=QSOX1 PE=1 SV=3                                                       | sp O00391 QSOX1_HUMAN  | 83  | 26 | 12  | 12  | 5   |
| Complement component C9 OS=Homo sapiens GN=C9 PE=1<br>SV=2                                                    | sp P02748 CO9_HUMAN    | 63  | 25 | 95  | 161 | 137 |
| Hemopexin OS=Homo sapiens GN=HPX PE=1 SV=2                                                                    | sp P02790 HEMO_HUMAN   | 52  | 25 | 2   | 101 | 67  |
| Vitronectin OS=Homo sapiens GN=VTN PE=1 SV=1                                                                  | sp P04004 VTNC_HUMAN   | 54  | 24 | 57  | 76  | 62  |
| Desmoglein-1 OS=Homo sapiens GN=DSG1 PE=1 SV=2                                                                | sp Q02413 DSG1_HUMAN   | 114 | 23 | 29  | 5   | 27  |
| Alpha-1-acid glycoprotein 1 OS=Homo sapiens GN=ORM1<br>PE=1 SV=1                                              | sp P02763 A1AG1_HUMAN  | 24  | 23 | 8   | 37  | 25  |
| Immunoglobulin heavy variable 3-7 OS=Homo sapiens<br>GN=IGHV3-7 PE=1 SV=2                                     | sp P01780 HV307_HUMAN  | 13  | 22 | 19  | 38  | 15  |
| Afamin OS=Homo sapiens GN=AFM PE=1 SV=1                                                                       | sp P43652 AFAM_HUMAN   | 69  | 22 | 0   | 37  | 28  |
| Ig lambda-2 chain C regions OS=Homo sapiens GN=IGLC2 PE=1<br>SV=1                                             | sp P0CG05 LAC2_HUMAN   | 11  | 22 | 17  | 64  | 29  |
| Protein S100-A9 OS=Homo sapiens GN=S100A9 PE=1 SV=1                                                           | sp P06702 S100A9_HUMAN | 13  | 21 | 38  | 12  | 22  |

|                                                                                     |                              |     |    |     |     |     |
|-------------------------------------------------------------------------------------|------------------------------|-----|----|-----|-----|-----|
| N-acetylmuramoyl-L-alanine amidase OS=Homo sapiens<br>GN=PGLYRP2 PE=1 SV=1          | sp Q96PD5 PGRP2_HUMAN        | 62  | 20 | 33  | 53  | 37  |
| Hepatocyte growth factor-like protein OS=Homo sapiens<br>GN=MST1 PE=1 SV=2          | sp P26927 HGFL_HUMAN         | 80  | 20 | 20  | 6   | 2   |
| Apolipoprotein E OS=Homo sapiens GN=APOE PE=1 SV=1                                  | sp P02649 APOE_HUMAN         | 36  | 19 | 26  | 54  | 16  |
| Lysozyme C OS=Homo sapiens GN=LYZ PE=1 SV=1                                         | sp P61626 LYSC_HUMAN         | 17  | 19 | 27  | 11  | 11  |
| Carboxypeptidase N subunit 2 OS=Homo sapiens GN=CPN2<br>PE=1 SV=3                   | sp P22792 CPN2_HUMAN         | 61  | 19 | 30  | 23  | 32  |
| Cornifin-A OS=Homo sapiens GN=SPRR1A PE=1 SV=2                                      | sp P35321 SPR1A_HUMAN        | 10  | 18 | 13  | 11  | 11  |
| Proteoglycan 4 OS=Homo sapiens GN=PRG4 PE=1 SV=2                                    | sp Q92954 PRG4_HUMAN         | 151 | 17 | 19  | 26  | 15  |
| Insulin-like growth factor-binding protein 3 OS=Homo sapiens<br>GN=IGFBP3 PE=1 SV=2 | sp P17936 IBP3_HUMAN         | 32  | 17 | 38  | 10  | 10  |
| Protein-glutamine gamma-glutamyltransferase K OS=Homo<br>sapiens GN=TGM1 PE=1 SV=4  | sp P22735 TGM1_HUMAN         | 90  | 17 | 7   | 2   | 12  |
| Alpha-1-acid glycoprotein 2 OS=Homo sapiens GN=ORM2<br>PE=1 SV=2                    | sp P19652 A1AG2_HUMAN        | 24  | 17 | 14  | 9   | 16  |
| Dermcidin OS=Homo sapiens GN=DCD PE=1 SV=2                                          | sp P81605 DCD_HUMAN          | 11  | 16 | 8   | 4   | 9   |
| Complement factor H-related protein 1 OS=Homo sapiens<br>GN=CFHR1 PE=1 SV=2         | sp Q03591 FHR1_HUMAN         | 38  | 15 | 31  | 19  | 18  |
| Protein AMBP OS=Homo sapiens GN=AMBP PE=1 SV=1                                      | sp P02760 AMBP_HUMAN         | 39  | 14 | 62  | 47  | 97  |
| CD5 antigen-like OS=Homo sapiens GN=CD5L PE=1 SV=1                                  | sp O43866 CD5L_HUMAN         | 38  | 14 | 25  | 26  | 17  |
| Carboxypeptidase N catalytic chain OS=Homo sapiens<br>GN=CPN1 PE=1 SV=1             | sp P15169 CBPN_HUMAN         | 52  | 14 | 9   | 24  | 13  |
| Complement factor D OS=Homo sapiens GN=CFD PE=1 SV=5                                | sp P00746 CFAD_HUMAN         | 27  | 13 | 5   | 10  | 4   |
| Loricrin OS=Homo sapiens GN=LOR PE=1 SV=2                                           | sp P23490 LORI_HUMAN         | 26  | 13 | 7   | 2   | 3   |
| Antithrombin-III OS=Homo sapiens GN=SERPINC1 PE=1 SV=1                              | sp P01008 ANT3_HUMAN         | 53  | 12 | 10  | 49  | 40  |
| Glyceraldehyde-3-phosphate dehydrogenase OS=Homo<br>sapiens GN=GAPDH PE=1 SV=3      | sp P04406 G3P_HUMAN          | 36  | 12 | 24  | 7   | 16  |
| Apolipoprotein D OS=Homo sapiens GN=APOD PE=1 SV=1                                  | sp P05090 APOD_HUMAN         | 21  | 12 | 9   | 17  | 17  |
| Ficolin-2 OS=Homo sapiens GN=FCN2 PE=1 SV=2                                         | sp Q15485 FCN2_HUMAN         | 34  | 12 | 14  | 11  | 6   |
| Complement factor H-related protein 2 OS=Homo sapiens<br>GN=CFHR2 PE=1 SV=1         | sp P36980 FHR2_HUMAN         | 31  | 12 | 12  | 9   | 18  |
| Haptoglobin-related protein OS=Homo sapiens GN=HPR PE=2<br>SV=2                     | sp P00739 HPTR_HUMAN         | 39  | 12 | 11  | 21  | 13  |
| Tetranectin OS=Homo sapiens GN=CLEC3B PE=1 SV=3                                     | sp P05452 TETN_HUMAN         | 23  | 11 | 10  | 14  | 18  |
| Complement C1q subcomponent subunit A OS=Homo sapiens<br>GN=C1QA PE=1 SV=2          | sp P02745 C1QA_HUMAN         | 26  | 11 | 5   | 11  | 3   |
| Gelsolin OS=Homo sapiens GN=GSN PE=1 SV=1                                           | sp P06396 GELS_HUMAN         | 86  | 10 | 127 | 255 | 135 |
| Clusterin OS=Homo sapiens GN=CLU PE=1 SV=1                                          | sp P10909 CLUS_HUMAN         | 52  | 10 | 15  | 32  | 33  |
| Actin, cytoplasmic 1 OS=Homo sapiens GN=ACTB PE=1 SV=1                              | sp P60709 ACTB_HUMAN<br>(+1) | 42  | 10 | 31  | 15  | 23  |
| Ceruloplasmin OS=Homo sapiens GN=CP PE=1 SV=1                                       | sp P00450 CERU_HUMAN         | 122 | 10 | 5   | 9   | 43  |
| Immunoglobulin heavy variable 3-33 OS=Homo sapiens<br>GN=IGHV3-33 PE=1 SV=2         | sp P01772 HV333_HUMAN        | 13  | 10 | 15  | 23  | 9   |
| Platelet basic protein OS=Homo sapiens GN=PPBP PE=1 SV=3                            | sp P02775 CXCL7_HUMAN        | 14  | 10 | 11  | 8   | 9   |
| Ficolin-3 OS=Homo sapiens GN=FCN3 PE=1 SV=2                                         | sp O75636 FCN3_HUMAN         | 33  | 10 | 3   | 0   | 3   |
| Filaggrin OS=Homo sapiens GN=FLG PE=1 SV=3                                          | sp P20930 FILA_HUMAN         | 435 | 9  | 22  | 2   | 15  |
| Plakophilin-1 OS=Homo sapiens GN=PKP1 PE=1 SV=2                                     | sp Q13835 PKP1_HUMAN         | 83  | 9  | 9   | 2   | 15  |
| Caspase-14 OS=Homo sapiens GN=CASP14 PE=1 SV=2                                      | sp P31944 CASPE_HUMAN        | 28  | 9  | 13  | 3   | 10  |
| Immunoglobulin J chain OS=Homo sapiens GN=JCHAIN PE=1<br>SV=4                       | sp P01591 IGJ_HUMAN          | 18  | 9  | 6   | 18  | 6   |
| Immunoglobulin kappa variable 4-1 OS=Homo sapiens<br>GN=IGKV4-1 PE=1 SV=1           | sp P06312 KV401_HUMAN        | 13  | 9  | 4   | 5   | 2   |

|                                                                                        |                            |     |   |    |    |     |
|----------------------------------------------------------------------------------------|----------------------------|-----|---|----|----|-----|
| Arachidonate 12-lipoxygenase, 12R-type OS=Homo sapiens GN=ALOX12B PE=1 SV=1            | sp O75342 LX12B_HUMAN      | 80  | 9 | 6  | 0  | 7   |
| Serum amyloid P-component OS=Homo sapiens GN=APCS PE=1 SV=2                            | sp P02743 SAMP_HUMAN       | 25  | 8 | 34 | 67 | 55  |
| Vitamin K-dependent protein S OS=Homo sapiens GN=PROS1 PE=1 SV=1                       | sp P07225 PROS_HUMAN       | 75  | 8 | 40 | 36 | 63  |
| Apolipoprotein(a) OS=Homo sapiens GN=LPA PE=1 SV=1                                     | sp P08519 APOA_HUMAN       | 501 | 8 | 15 | 45 | 6   |
| Annexin A2 OS=Homo sapiens GN=ANXA2 PE=1 SV=2                                          | sp P07355 ANXA2_HUMAN      | 39  | 8 | 7  | 6  | 13  |
| Small proline-rich protein 2E OS=Homo sapiens GN=SPRR2E PE=2 SV=2                      | sp P22531 SPR2E_HUMAN      | 8   | 8 | 6  | 5  | 4   |
| Apolipoprotein A-II OS=Homo sapiens GN=APOA2 PE=1 SV=1                                 | sp P02652 APOA2_HUMAN      | 11  | 8 | 2  | 8  | 0   |
| Complement factor I OS=Homo sapiens GN=CFI PE=1 SV=2                                   | sp P05156 CFAI_HUMAN       | 66  | 7 | 43 | 96 | 117 |
| Immunoglobulin kappa variable 3-20 OS=Homo sapiens GN=IGKV3-20 PE=1 SV=2               | sp P01619 KV320_HUMAN      | 13  | 7 | 9  | 17 | 6   |
| Peroxiredoxin-1 OS=Homo sapiens GN=PRDX1 PE=1 SV=1                                     | sp Q06830 PRDX1_HUMAN      | 22  | 7 | 9  | 4  | 6   |
| Alpha-1B-glycoprotein OS=Homo sapiens GN=A1BG PE=1 SV=4                                | sp P04217 A1BG_HUMAN       | 54  | 7 | 4  | 7  | 9   |
| Ig lambda-7 chain C region OS=Homo sapiens GN=IGLC7 PE=4 SV=2                          | sp A0M8Q6 LAC7_HUMAN       | 11  | 7 | 0  | 11 | 7   |
| Hepatocyte growth factor activator OS=Homo sapiens GN=HGFA PE=1 SV=1                   | sp Q04756 HGFA_HUMAN       | 71  | 6 | 43 | 13 | 27  |
| Properdin OS=Homo sapiens GN=CFP PE=1 SV=2                                             | sp P27918 PROP_HUMAN       | 51  | 6 | 18 | 6  | 4   |
| Protein Z-dependent protease inhibitor OS=Homo sapiens GN=SERPINA10 PE=1 SV=1          | sp Q9UK55 ZPI_HUMAN        | 51  | 6 | 14 | 11 | 2   |
| Fructose-bisphosphate aldolase A OS=Homo sapiens GN=ALDOA PE=1 SV=2                    | sp P04075 ALDOA_HUMAN      | 39  | 6 | 0  | 0  | 0   |
| Immunoglobulin kappa variable 3-15 OS=Homo sapiens GN=IGKV3-15 PE=1 SV=2               | sp P01624 KV315_HUMAN      | 12  | 5 | 2  | 19 | 6   |
| Immunoglobulin lambda variable 3-19 OS=Homo sapiens GN=IGLV3-19 PE=1 SV=2              | sp P01714 LV319_HUMAN      | 12  | 5 | 3  | 7  | 7   |
| Immunoglobulin heavy variable 4-39 OS=Homo sapiens GN=IGHV4-39 PE=1 SV=2               | sp P01824 HV439_HUMAN (+2) | 14  | 5 | 0  | 8  | 2   |
| Neuroblast differentiation-associated protein AHNAK OS=Homo sapiens GN=AHNAK PE=1 SV=2 | sp Q09666 AHNK_HUMAN       | 629 | 5 | 3  | 0  | 3   |
| Serum amyloid A-4 protein OS=Homo sapiens GN=SAA4 PE=1 SV=2                            | sp P35542 SAA4_HUMAN       | 15  | 5 | 2  | 5  | 0   |
| Protein S100-A14 OS=Homo sapiens GN=S100A14 PE=1 SV=1                                  | sp Q9HCY8 S10AE_HUMAN      | 12  | 5 | 2  | 0  | 2   |
| Serum paraoxonase/arylesterase 1 OS=Homo sapiens GN=PON1 PE=1 SV=3                     | sp P27169 PON1_HUMAN       | 40  | 4 | 6  | 15 | 15  |
| Glycoprotein hormones alpha chain OS=Homo sapiens GN=CGA PE=1 SV=1                     | sp P01215 GLHA_HUMAN       | 13  | 4 | 12 | 7  | 11  |
| Gasdermin-A OS=Homo sapiens GN=GSDMA PE=1 SV=4                                         | sp Q96QA5 GSDMA_HUMAN      | 49  | 4 | 5  | 0  | 8   |
| Gamma-glutamyl hydrolase OS=Homo sapiens GN=GGH PE=1 SV=2                              | sp Q92820 GGH_HUMAN        | 36  | 4 | 7  | 6  | 5   |
| Fatty acid-binding protein, epidermal OS=Homo sapiens GN=FABP5 PE=1 SV=3               | sp Q01469 FABP5_HUMAN      | 15  | 4 | 14 | 0  | 6   |
| Gamma-glutamylcyclotransferase OS=Homo sapiens GN=GGCT PE=1 SV=1                       | sp O75223 GGCT_HUMAN       | 21  | 4 | 11 | 0  | 3   |
| Serpin B12 OS=Homo sapiens GN=SERPINB12 PE=1 SV=1                                      | sp Q96P63 SPB12_HUMAN      | 46  | 4 | 8  | 0  | 5   |
| Galectin-7 OS=Homo sapiens GN=LGALS7 PE=1 SV=2                                         | sp P47929 LEG7_HUMAN       | 15  | 4 | 5  | 0  | 2   |
| Peptidyl-prolyl cis-trans isomerase B OS=Homo sapiens GN=PPIB PE=1 SV=2                | sp P23284 PPIB_HUMAN       | 24  | 4 | 0  | 0  | 0   |
| Protein-glutamine gamma-glutamyltransferase E OS=Homo sapiens GN=TGM3 PE=1 SV=4        | sp Q08188 TGM3_HUMAN       | 77  | 3 | 18 | 2  | 8   |
| Immunoglobulin kappa variable 2-30 OS=Homo sapiens GN=IGKV2-30 PE=3 SV=2               | sp P06310 KV230_HUMAN      | 13  | 3 | 0  | 6  | 2   |
| Desmocollin-1 OS=Homo sapiens GN=DSC1 PE=1 SV=2                                        | sp Q08554 DSC1_HUMAN       | 100 | 3 | 2  | 0  | 12  |

|                                                                                  |                            |      |   |    |   |    |
|----------------------------------------------------------------------------------|----------------------------|------|---|----|---|----|
| Mannose-binding protein C OS=Homo sapiens GN=MBL2 PE=1 SV=2                      | sp P11226 MBL2_HUMAN       | 26   | 3 | 3  | 8 | 4  |
| Immunoglobulin lambda variable 2-23 OS=Homo sapiens GN=IGLV2-23 PE=1 SV=2        | sp P01705 LV223_HUMAN      | 12   | 3 | 3  | 3 | 0  |
| Immunoglobulin lambda variable 1-47 OS=Homo sapiens GN=IGLV1-47 PE=1 SV=2        | sp P01700 LV147_HUMAN      | 12   | 3 | 0  | 4 | 2  |
| Angiotensinogen OS=Homo sapiens GN=AGT PE=1 SV=1                                 | sp P01019 ANGT_HUMAN       | 53   | 3 | 5  | 0 | 2  |
| Heat shock protein HSP 90-beta OS=Homo sapiens GN=HSP90AB1 PE=1 SV=4             | sp P08238 HS90B_HUMAN      | 83   | 3 | 3  | 0 | 0  |
| Histone H2B type 1-K OS=Homo sapiens GN=HIST1H2BK PE=1 SV=3                      | sp O60814 H2B1K_HUMAN (+7) | 14   | 3 | 0  | 3 | 2  |
| Thrombospondin-1 OS=Homo sapiens GN=THBS1 PE=1 SV=2                              | sp P07996 TSP1_HUMAN       | 129  | 3 | 2  | 0 | 3  |
| Protein S100-A16 OS=Homo sapiens GN=S100A16 PE=1 SV=1                            | sp Q96FQ6 S10AG_HUMAN      | 12   | 3 | 0  | 0 | 0  |
| Elongation factor 1-alpha 1 OS=Homo sapiens GN=EEF1A1 PE=1 SV=1                  | sp P68104 EF1A1_HUMAN (+1) | 50   | 3 | 0  | 0 | 2  |
| ADP-ribosylation factor 3 OS=Homo sapiens GN=ARF3 PE=1 SV=2                      | sp P61204 ARF3_HUMAN (+2)  | 21   | 3 | 0  | 0 | 0  |
| Choriogonadotropin subunit beta 3 OS=Homo sapiens GN=CGB3 PE=1 SV=1              | sp P0DN86 CGB3_HUMAN (+2)  | 18   | 2 | 17 | 9 | 15 |
| Serpin B3 OS=Homo sapiens GN=SERPINB3 PE=1 SV=2                                  | sp P29508 SPB3_HUMAN       | 45   | 2 | 22 | 0 | 0  |
| Immunoglobulin kappa variable 1-17 OS=Homo sapiens GN=IGKV1-17 PE=1 SV=2         | sp P01599 KV117_HUMAN      | 13   | 2 | 0  | 3 | 3  |
| Protein S100-A7 OS=Homo sapiens GN=S100A7 PE=1 SV=4                              | sp P31151 S10A7_HUMAN      | 11   | 2 | 8  | 2 | 3  |
| Neutrophil defensin 3 OS=Homo sapiens GN=DEFA3 PE=1 SV=1                         | sp P59666 DEF3_HUMAN       | 10 k | 2 | 6  | 2 | 2  |
| Cathepsin D OS=Homo sapiens GN=CTSD PE=1 SV=1                                    | sp P07339 CATD_HUMAN       | 45   | 2 | 9  | 0 | 5  |
| Insulin-like growth factor-binding protein 6 OS=Homo sapiens GN=IGFBP6 PE=1 SV=1 | sp P24592 IBP6_HUMAN       | 25   | 2 | 6  | 0 | 2  |
| Prolactin-inducible protein OS=Homo sapiens GN=PIP PE=1 SV=1                     | sp P12273 PIP_HUMAN        | 17   | 2 | 2  | 0 | 0  |
| Ig delta chain C region OS=Homo sapiens GN=IGHD PE=1 SV=2                        | sp P01880 IGHD_HUMAN       | 42   | 2 | 0  | 7 | 6  |
| Glutathione peroxidase 3 OS=Homo sapiens GN=GPX3 PE=1 SV=2                       | sp P22352 GPX3_HUMAN       | 26   | 2 | 0  | 2 | 2  |
| Zinc-alpha-2-glycoprotein OS=Homo sapiens GN=AZGP1 PE=1 SV=2                     | sp P25311 ZA2G_HUMAN       | 34   | 2 | 6  | 0 | 4  |
| 14-3-3 protein zeta/delta OS=Homo sapiens GN=YWHAZ PE=1 SV=1                     | sp P63104 1433Z_HUMAN      | 28   | 2 | 2  | 5 | 2  |
| Cystatin-A OS=Homo sapiens GN=CSTA PE=1 SV=1                                     | sp P01040 CYTA_HUMAN       | 11   | 2 | 4  | 0 | 0  |
| Lipocalin-1 OS=Homo sapiens GN=LCN1 PE=1 SV=1                                    | sp P31025 LCN1_HUMAN       | 19   | 2 | 4  | 2 | 2  |
| Catalase OS=Homo sapiens GN=CAT PE=1 SV=3                                        | sp P04040 CATA_HUMAN       | 60   | 2 | 3  | 0 | 4  |
| Metalloproteinase inhibitor 2 OS=Homo sapiens GN=TIMP2 PE=1 SV=2                 | sp P16035 TIMP2_HUMAN      | 24   | 2 | 3  | 3 | 0  |
| Extracellular superoxide dismutase [Cu-Zn] OS=Homo sapiens GN=SOD3 PE=1 SV=2     | sp P08294 SODE_HUMAN       | 26   | 2 | 3  | 0 | 3  |
| Tubulin alpha-1B chain OS=Homo sapiens GN=TUBA1B PE=1 SV=1                       | sp P68363 TBA1B_HUMAN (+2) | 50   | 2 | 0  | 0 | 2  |
| Centromere-associated protein E OS=Homo sapiens GN=CENPE PE=1 SV=2               | sp Q02224 CENPE_HUMAN      | 316  | 2 | 0  | 0 | 0  |
| Immunoglobulin lambda variable 7-43 OS=Homo sapiens GN=IGLV7-43 PE=3 SV=2        | sp P04211 LV743_HUMAN      | 12   | 2 | 2  | 2 | 0  |
| Histone H4 OS=Homo sapiens GN=HIST1H4A PE=1 SV=2                                 | sp P62805 H4_HUMAN         | 11   | 2 | 0  | 0 | 2  |
| Heat shock cognate 71 kDa protein OS=Homo sapiens GN=HSPA8 PE=1 SV=1             | sp P11142 HSP7C_HUMAN      | 71   | 2 | 2  | 0 | 2  |
| Protein POF1B OS=Homo sapiens GN=POF1B PE=1 SV=3                                 | sp Q8WVV4 POF1B_HUMAN      | 68   | 2 | 2  | 0 | 3  |
| L-lactate dehydrogenase A chain OS=Homo sapiens GN=LDHA PE=1 SV=2                | sp P00338 LDHA_HUMAN       | 37   | 2 | 0  | 0 | 0  |

|                                                                                         |                           |     |   |    |     |     |
|-----------------------------------------------------------------------------------------|---------------------------|-----|---|----|-----|-----|
| Pyruvate kinase PKM OS=Homo sapiens GN=PKM PE=1 SV=4                                    | sp P14618 KPYM_HUMAN      | 58  | 2 | 0  | 0   | 0   |
| Fibrinogen beta chain OS=Homo sapiens GN=FGB PE=1 SV=2                                  | sp P02675 FIBB_HUMAN      | 56  | 0 | 36 | 263 | 245 |
| Fibrinogen gamma chain OS=Homo sapiens GN=FGG PE=1 SV=3                                 | sp P02679 FIBG_HUMAN      | 52  | 0 | 44 | 233 | 215 |
| Complement component C7 OS=Homo sapiens GN=C7 PE=1 SV=2                                 | sp P10643 CO7_HUMAN       | 94  | 0 | 0  | 0   | 120 |
| Keratin, type II cytoskeletal 4 OS=Homo sapiens GN=KRT4 PE=1 SV=4                       | sp P19013 K2C4_HUMAN      | 57  | 0 | 10 | 43  | 39  |
| Keratin, type I cytoskeletal 13 OS=Homo sapiens GN=KRT13 PE=1 SV=4                      | sp P13646 K1C13_HUMAN     | 50  | 0 | 20 | 34  | 70  |
| Complement C1r subcomponent OS=Homo sapiens GN=C1R PE=1 SV=2                            | sp P00736 C1R_HUMAN       | 80  | 0 | 9  | 10  | 48  |
| Complement component C6 OS=Homo sapiens GN=C6 PE=1 SV=3                                 | sp P13671 CO6_HUMAN       | 105 | 0 | 0  | 0   | 75  |
| Selenoprotein P OS=Homo sapiens GN=SEPP1 PE=1 SV=3                                      | sp P49908 SEPP1_HUMAN     | 43  | 0 | 24 | 6   | 5   |
| Immunoglobulin heavy variable 3-15 OS=Homo sapiens GN=IGHV3-15 PE=3 SV=1                | sp A0A0B411V0 HV315_HUMAN | 13  | 0 | 0  | 7   | 0   |
| Keratin, type II cytoskeletal 2 oral OS=Homo sapiens GN=KRT76 PE=1 SV=2                 | sp Q01546 K22O_HUMAN      | 66  | 0 | 17 | 0   | 0   |
| Ig gamma-4 chain C region OS=Homo sapiens GN=IGHG4 PE=1 SV=1                            | sp P01861 IGHG4_HUMAN     | 36  | 0 | 0  | 31  | 0   |
| Lactotransferrin OS=Homo sapiens GN=LTF PE=1 SV=6                                       | sp P02788 TRFL_HUMAN      | 78  | 0 | 20 | 0   | 5   |
| Galectin-3-binding protein OS=Homo sapiens GN=LGALS3BP PE=1 SV=1                        | sp Q08380 LG3BP_HUMAN     | 65  | 0 | 15 | 0   | 5   |
| Transthyretin OS=Homo sapiens GN=TTR PE=1 SV=1                                          | sp P02766 TTHY_HUMAN      | 16  | 0 | 2  | 6   | 4   |
| Coagulation factor V OS=Homo sapiens GN=F5 PE=1 SV=4                                    | sp P12259 FA5_HUMAN       | 252 | 0 | 5  | 0   | 10  |
| Annexin A1 OS=Homo sapiens GN=ANXA1 PE=1 SV=2                                           | sp P04083 ANXA1_HUMAN     | 39  | 0 | 2  | 11  | 9   |
| Phosphatidylinositol-glycan-specific phospholipase D OS=Homo sapiens GN=GPLD1 PE=1 SV=3 | sp P80108 PHLD_HUMAN      | 92  | 0 | 2  | 0   | 18  |
| Polyubiquitin-B OS=Homo sapiens GN=UBB PE=1 SV=1                                        | sp P0CG47 UBB_HUMAN (+3)  | 26  | 0 | 6  | 0   | 0   |
| Alpha-amylase 1 OS=Homo sapiens GN=AMY1A PE=1 SV=2                                      | sp P04745 AMY1_HUMAN      | 58  | 0 | 0  | 13  | 0   |
| F-box only protein 50 OS=Homo sapiens GN=NCCRP1 PE=1 SV=1                               | sp Q6ZVX7 FBX50_HUMAN     | 31  | 0 | 2  | 0   | 4   |
| Apolipoprotein L1 OS=Homo sapiens GN=APOL1 PE=1 SV=5                                    | sp O14791 APOL1_HUMAN     | 44  | 0 | 0  | 12  | 0   |
| C4b-binding protein beta chain OS=Homo sapiens GN=C4BPB PE=1 SV=1                       | sp P20851 C4BPB_HUMAN     | 28  | 0 | 3  | 3   | 7   |
| Complement factor H-related protein 4 OS=Homo sapiens GN=CFHR4 PE=1 SV=3                | sp Q92496 FHR4_HUMAN      | 65  | 0 | 8  | 0   | 2   |
| Neuropilin-1 OS=Homo sapiens GN=NRP1 PE=1 SV=3                                          | sp O14786 NRP1_HUMAN      | 103 | 0 | 8  | 0   | 2   |
| L-lactate dehydrogenase B chain OS=Homo sapiens GN=LDHB PE=1 SV=2                       | sp P07195 LDHB_HUMAN      | 37  | 0 | 2  | 0   | 6   |
| Alpha-2-antiplasmin OS=Homo sapiens GN=SERPINF2 PE=1 SV=3                               | sp P08697 A2AP_HUMAN      | 55  | 0 | 3  | 0   | 4   |
| Ribonuclease pancreatic OS=Homo sapiens GN=RNASE1 PE=1 SV=4                             | sp P07998 RNAS1_HUMAN     | 18  | 0 | 11 | 0   | 0   |
| Pregnancy-specific beta-1-glycoprotein 6 OS=Homo sapiens GN=PSG6 PE=2 SV=1              | sp Q00889 PSG6_HUMAN      | 49  | 0 | 6  | 0   | 6   |
| Neutrophil gelatinase-associated lipocalin OS=Homo sapiens GN=LCN2 PE=1 SV=2            | sp P80188 NGAL_HUMAN      | 23  | 0 | 5  | 0   | 5   |
| Coagulation factor XIII B chain OS=Homo sapiens GN=F13B PE=1 SV=3                       | sp P05160 F13B_HUMAN      | 76  | 0 | 0  | 0   | 11  |
| ATP synthase subunit alpha, mitochondrial OS=Homo sapiens GN=ATP5A1 PE=1 SV=1           | sp P25705 ATPA_HUMAN      | 60  | 0 | 0  | 3   | 3   |
| Arginase-1 OS=Homo sapiens GN=ARG1 PE=1 SV=2                                            | sp P05089 ARG1_HUMAN      | 35  | 0 | 2  | 0   | 2   |
| Vitamin D-binding protein OS=Homo sapiens GN=GC PE=1 SV=1                               | sp P02774 VTDB_HUMAN      | 53  | 0 | 7  | 0   | 2   |



|                                                                                                         |                                |      |   |   |   |   |
|---------------------------------------------------------------------------------------------------------|--------------------------------|------|---|---|---|---|
| Retinol-binding protein 4 OS=Homo sapiens GN=RBP4 PE=1 SV=3                                             | sp P02753 RET4_HUMAN           | 23   | 0 | 0 | 4 | 7 |
| Hemoglobin subunit beta OS=Homo sapiens GN=HBB PE=1 SV=2                                                | sp P68871 HBB_HUMAN            | 16   | 0 | 0 | 0 | 2 |
| Immunoglobulin kappa variable 2-28 OS=Homo sapiens GN=IGKV2-28 PE=3 SV=1                                | sp A0A075B6P5 KV228_HUMAN (+2) | 13   | 0 | 0 | 0 | 3 |
| Calmodulin-like protein 5 OS=Homo sapiens GN=CALML5 PE=1 SV=2                                           | sp Q9NZT1 CALL5_HUMAN          | 16   | 0 | 3 | 0 | 0 |
| Small proline-rich protein 3 OS=Homo sapiens GN=SPRR3 PE=1 SV=2                                         | sp Q9UBC9 SPRR3_HUMAN          | 18   | 0 | 0 | 6 | 4 |
| Immunoglobulin lambda variable 2-8 OS=Homo sapiens GN=IGLV2-8 PE=1 SV=2                                 | sp P01709 LV208_HUMAN          | 12   | 0 | 0 | 5 | 0 |
| Alpha-2-HS-glycoprotein OS=Homo sapiens GN=AHSG PE=1 SV=1                                               | sp P02765 FETUA_HUMAN          | 39   | 0 | 0 | 0 | 3 |
| Immunoglobulin heavy variable 1-46 OS=Homo sapiens GN=IGHV1-46 PE=1 SV=2                                | sp P01743 HV146_HUMAN          | 13   | 0 | 0 | 4 | 0 |
| Suprabasin OS=Homo sapiens GN=SBSN PE=1 SV=2                                                            | sp Q6UWP8 SBSN_HUMAN           | 61   | 0 | 2 | 0 | 2 |
| P-selectin OS=Homo sapiens GN=SELP PE=1 SV=3                                                            | sp P16109 LYAM3_HUMAN          | 91   | 0 | 4 | 0 | 2 |
| Cartilage acidic protein 1 OS=Homo sapiens GN=CRTAC1 PE=1 SV=2                                          | sp Q9NQ79 CRAC1_HUMAN          | 71   | 0 | 0 | 0 | 3 |
| Cytoplasmic dynein 2 heavy chain 1 OS=Homo sapiens GN=DYNC2H1 PE=1 SV=4                                 | sp Q8NCM8 DYHC2_HUMAN          | 493  | 0 | 2 | 0 | 0 |
| Protein S100-A11 OS=Homo sapiens GN=S100A11 PE=1 SV=2                                                   | sp P31949 S10AB_HUMAN          | 12   | 0 | 0 | 2 | 0 |
| Heat shock 70 kDa protein 1A OS=Homo sapiens GN=HSPA1A PE=1 SV=1                                        | sp P0DMV8 HS71A_HUMAN (+2)     | 70   | 0 | 3 | 0 | 0 |
| Hydroperoxide isomerase ALOXE3 OS=Homo sapiens GN=ALOXE3 PE=1 SV=1                                      | sp Q9BYJ1 LOXE3_HUMAN          | 81   | 0 | 0 | 0 | 2 |
| Transmembrane glycoprotein NMB OS=Homo sapiens GN=GPNMB PE=1 SV=2                                       | sp Q14956 GPNMB_HUMAN          | 64   | 0 | 2 | 0 | 0 |
| Polymeric immunoglobulin receptor OS=Homo sapiens GN=PIGR PE=1 SV=4                                     | sp P01833 PIGR_HUMAN           | 83   | 0 | 2 | 0 | 0 |
| Tropomyosin alpha-4 chain OS=Homo sapiens GN=TPM4 PE=1 SV=3                                             | sp P67936 TPM4_HUMAN           | 29   | 0 | 2 | 0 | 0 |
| A disintegrin and metalloproteinase with thrombospondin motifs 13 OS=Homo sapiens GN=ADAMTS13 PE=1 SV=1 | sp Q76LX8 ATS13_HUMAN          | 154  | 0 | 2 | 0 | 0 |
| Tenascin-X OS=Homo sapiens GN=TNXB PE=1 SV=4                                                            | sp P22105 TENX_HUMAN           | 458  | 0 | 0 | 0 | 4 |
| Immunoglobulin lambda variable 1-51 OS=Homo sapiens GN=IGLV1-51 PE=1 SV=2                               | sp P01701 LV151_HUMAN          | 12   | 0 | 0 | 3 | 0 |
| Thioredoxin OS=Homo sapiens GN=TXN PE=1 SV=3                                                            | sp P10599 THIO_HUMAN           | 12   | 0 | 2 | 0 | 0 |
| Hemoglobin subunit alpha OS=Homo sapiens GN=HBA1 PE=1 SV=2                                              | sp P69905 HBA_HUMAN            | 15   | 0 | 0 | 0 | 2 |
| Insulin-like growth factor-binding protein 2 OS=Homo sapiens GN=IGFBP2 PE=1 SV=2                        | sp P18065 IBP2_HUMAN           | 35   | 0 | 2 | 0 | 0 |
| Insulin-like growth factor-binding protein 4 OS=Homo sapiens GN=IGFBP4 PE=1 SV=2                        | sp P22692 IBP4_HUMAN           | 28   | 0 | 3 | 0 | 0 |
| Pregnancy-specific beta-1-glycoprotein 4 OS=Homo sapiens GN=PSG4 PE=2 SV=3                              | sp Q00888 PSG4_HUMAN           | 47   | 0 | 7 | 0 | 0 |
| Keratin, type I cytoskeletal 18 OS=Homo sapiens GN=KRT18 PE=1 SV=2                                      | sp P05783 K1C18_HUMAN          | 48 k | 0 | 3 | 0 | 0 |
| Peptidoglycan recognition protein 1 OS=Homo sapiens GN=PGLYRP1 PE=1 SV=1                                | sp O75594 PGRP1_HUMAN          | 22   | 0 | 2 | 0 | 0 |
| Attractin OS=Homo sapiens GN=ATRN PE=1 SV=2                                                             | sp O75882 ATRN_HUMAN           | 159  | 0 | 0 | 0 | 2 |
| Inter-alpha-trypsin inhibitor heavy chain H3 OS=Homo sapiens GN=ITIH3 PE=1 SV=2                         | sp Q06033 ITIH3_HUMAN          | 100  | 0 | 0 | 0 | 2 |
| Lysosome-associated membrane glycoprotein 1 OS=Homo sapiens GN=LAMP1 PE=1 SV=3                          | sp P11279 LAMP1_HUMAN          | 45   | 0 | 2 | 0 | 0 |
| Mucin-5B OS=Homo sapiens GN=MUC5B PE=1 SV=3                                                             | sp Q9HC84 MUC5B_HUMAN          | 596  | 0 | 0 | 2 | 0 |
| Collagen alpha-1(III) chain OS=Homo sapiens GN=COL3A1 PE=1 SV=4                                         | sp P02461 CO3A1_HUMAN          | 139  | 0 | 0 | 0 | 3 |

|                                                                               |                       |     |   |   |   |   |
|-------------------------------------------------------------------------------|-----------------------|-----|---|---|---|---|
| Alpha-2-macroglobulin-like protein 1 OS=Homo sapiens<br>GN=A2ML1 PE=1 SV=3    | sp A8K2U0 A2ML1_HUMAN | 161 | 0 | 2 | 0 | 0 |
| Protein sel-1 homolog 3 OS=Homo sapiens GN=SEL1L3 PE=1<br>SV=2                | sp Q68CR1 SE1L3_HUMAN | 129 | 0 | 0 | 0 | 2 |
| Pregnancy-specific beta-1-glycoprotein 1 OS=Homo sapiens<br>GN=PSG1 PE=1 SV=1 | sp P11464 PSG1_HUMAN  | 47  | 0 | 0 | 0 | 8 |
